# Supplementary material for: The Effect of Vitamin D Consumption on Pro-Inflammatory Cytokines in Athletes: A Systematic Review of Randomized Controlled Trials
Source: MDPI journal article supplement (doi:10.3390/sports12010032), 2024-01-13
Supplement: s1 [file s1]

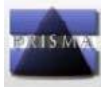

## PRISMA 2020 for Abstracts Checklist

| Section and Topic                                                                                                                                 | Item # | Checklist item                                                                                                                                                                                                                                                                                        | Reported (Yes/No) |
|---------------------------------------------------------------------------------------------------------------------------------------------------|--------|-------------------------------------------------------------------------------------------------------------------------------------------------------------------------------------------------------------------------------------------------------------------------------------------------------|-------------------|
| <b>TITLE - The effect of vitamin D consumption on pro-inflammatory cytokines in athletes: a systematic review of randomized controlled trials</b> |        |                                                                                                                                                                                                                                                                                                       |                   |
| Title                                                                                                                                             | 1      | Identify the report as a systematic review.                                                                                                                                                                                                                                                           | Yes               |
| <b>BACKGROUND</b>                                                                                                                                 |        |                                                                                                                                                                                                                                                                                                       |                   |
| Objectives                                                                                                                                        | 2      | Provide an explicit statement of the main objective(s) or question(s) the review addresses.                                                                                                                                                                                                           | Yes               |
| <b>METHODS</b>                                                                                                                                    |        |                                                                                                                                                                                                                                                                                                       |                   |
| Eligibility criteria                                                                                                                              | 3      | Specify the inclusion and exclusion criteria for the review.                                                                                                                                                                                                                                          | Yes               |
| Information sources                                                                                                                               | 4      | Specify the information sources (e.g. databases, registers) used to identify studies and the date when each was last searched.                                                                                                                                                                        | Yes               |
| Risk of bias                                                                                                                                      | 5      | Specify the methods used to assess risk of bias in the included studies.                                                                                                                                                                                                                              | Yes               |
| Synthesis of results                                                                                                                              | 6      | Specify the methods used to present and synthesise results.                                                                                                                                                                                                                                           | NA                |
| <b>RESULTS</b>                                                                                                                                    |        |                                                                                                                                                                                                                                                                                                       |                   |
| Included studies                                                                                                                                  | 7      | Give the total number of included studies and participants and summarise relevant characteristics of studies.                                                                                                                                                                                         | Yes               |
| Synthesis of results                                                                                                                              | 8      | Present results for main outcomes, preferably indicating the number of included studies and participants for each. If meta-analysis was done, report the summary estimate and confidence/credible interval. If comparing groups, indicate the direction of the effect (i.e. which group is favoured). | Yes               |
| <b>DISCUSSION</b>                                                                                                                                 |        |                                                                                                                                                                                                                                                                                                       |                   |
| Limitations of evidence                                                                                                                           | 9      | Provide a brief summary of the limitations of the evidence included in the review (e.g. study risk of bias, inconsistency and imprecision).                                                                                                                                                           | Yes               |
| Interpretation                                                                                                                                    | 10     | Provide a general interpretation of the results and important implications.                                                                                                                                                                                                                           | Yes               |
| <b>OTHER</b>                                                                                                                                      |        |                                                                                                                                                                                                                                                                                                       |                   |
| Funding                                                                                                                                           | 11     | Specify the primary source of funding for the review.                                                                                                                                                                                                                                                 | NA                |
| Registration                                                                                                                                      | 12     | Provide the register name and registration number.                                                                                                                                                                                                                                                    | NA                |

From: Page, M.J.; McKenzie, J.E.; Bossuyt, P.M.; Boutron, I.; Hoffmann, T.C.; Mulrow, C.D.; Shamseer, L.; Tetzlaff, J.M.; Akl, E.A.; Brennan, S.E.; et al. The PRISMA 2020 statement: An updated guideline for reporting systematic reviews. *Int. J. Surg.* **2021**, *88*, 105906.

For more information, visit: <http://www.prisma-statement.org/>
